# Supplementary material
Source: publisher site journal article supplement (https://www.spandidos-publications.com/1269/downloadSupplementary)

Figure S1. Diagnostic method and proportion of patients with astrocytoma between 2004 and 2015.

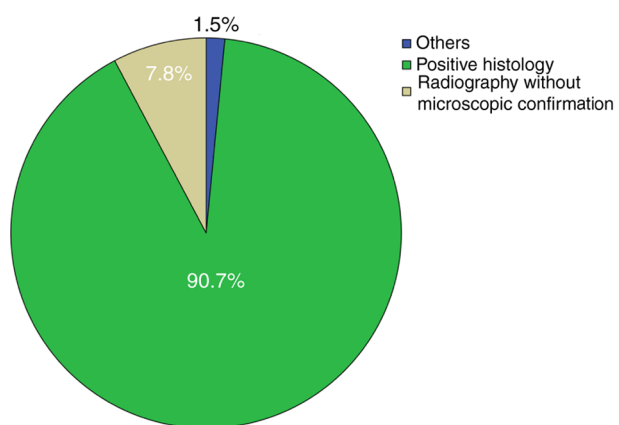

Supplement: Supplementary file 1 [file downloadSupplementary]
